# Supplementary material for: Novel Co-based metal–organic frameworks and their magnetic properties using asymmetrically binding 4-(4′-carboxyphenyl)-1,2,4-triazole
Source: Royal Society of Chemistry journal article supplement (doi:10.1039/c3dt33000a), 2013-01-01
Supplement: c3dt33000a.pdf [file c3dt33000a.pdf]

Electronic Supplemental Information

## Novel Co-based Metal-Organic Frameworks and Their Magnetic Properties Using Asymmetrically Binding 4-(4'-carboxyphenyl)-1,2,4-triazole.

Tomoko Aharen,<sup>a</sup> Fatemah Habib,<sup>a</sup> Ilia Korobkov,<sup>a</sup> Tara J. Burchell,<sup>a</sup> Rémy Guillet-Nicolas,<sup>b</sup> Fredy Kleiz,<sup>b</sup> and Muralee Murugesu<sup>\*a</sup>

<sup>a</sup> Department of Chemistry, University of Ottawa, 10 Marie Curie Private, Ottawa, Canada, K1N 6N5. Fax: +1 (613)562 5170; Tel: +1 613 562 5800 ext. 2733; E-mail: m.murugesu@uottawa.ca

<sup>b</sup> Département de Chimie, Pavillon Alexandre-Vachon, local 2240-F 1045 avenue de la médecine, Université Laval (Québec) G1V 0A6, QC, Canada

**Table S1** Selected atomic distances for **Co-MOF1** (Å).

| distances (Å)         |            |
|-----------------------|------------|
| Co1-O2                | 2.0220(18) |
| Co-O3                 | 2.074(7)   |
| Co1-O1                | 2.099(5)   |
| Co1-O1 <sup>i</sup>   | 2.099(5)   |
| Co1-N1 <sup>ii</sup>  | 2.136(5)   |
| Co1-N1 <sup>iii</sup> | 2.136(5)   |

(i) x, 1+x-y, z; (ii) 1+x-y, x, -0.5+z; (iii) 1+x-y, 2-y, -0.5+z.

**Table S2** Selected atomic distances for **Co-MOF2** (Å).

| distances (Å)         |           |
|-----------------------|-----------|
| Co1-O1 <sup>i</sup>   | 2.0601(7) |
| Co-1-O1 <sup>ii</sup> | 2.0601(7) |
| Co1-N3                | 2.1458(6) |
| Co1-N3 <sup>iii</sup> | 2.1458(6) |
| Co1-N1 <sup>iii</sup> | 2.1523(8) |
| Co1-N1                | 2.1523(8) |

(i) 0.5-x, 0.5-y, -z; (ii) x, y, 1+z; (iii) 0.5-x, 0.5-y, 1-z; (iv) x, -y, z.

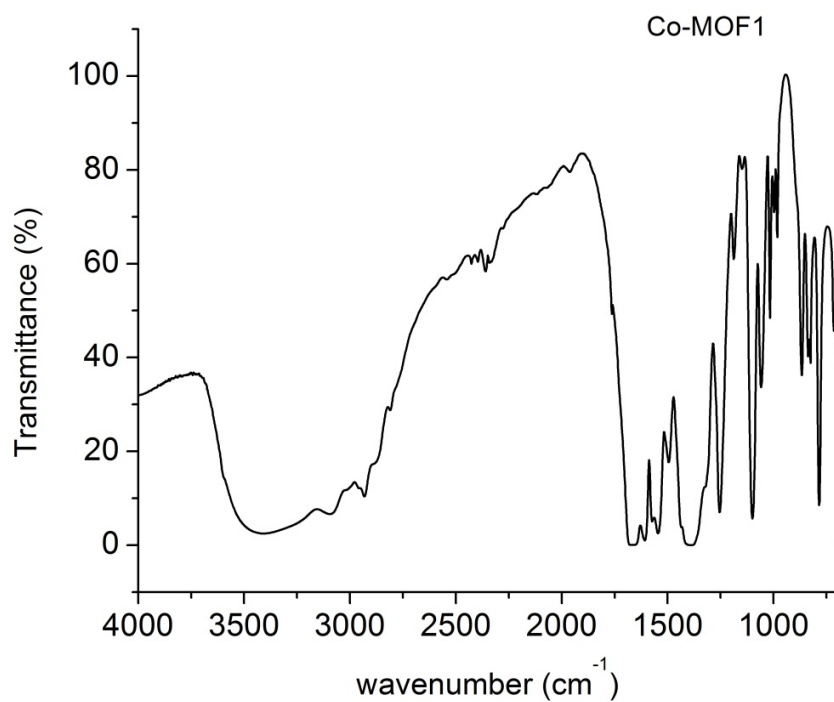

**Figure S1** IR data for **Co-MOF1**.

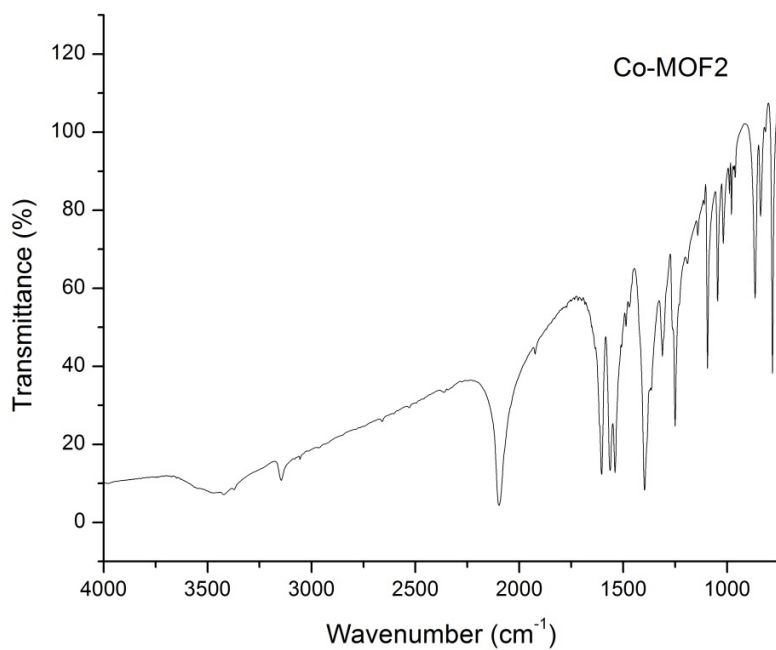

**Figure S2** IR data for **Co-MOF2**.

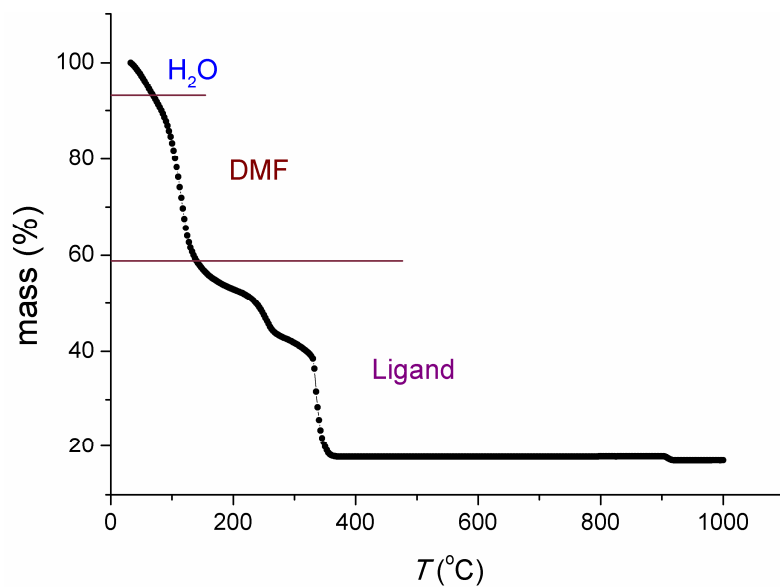

**Figure S3** Thermo-Gravimetric Analysis (TGA) of Co-MOF1.

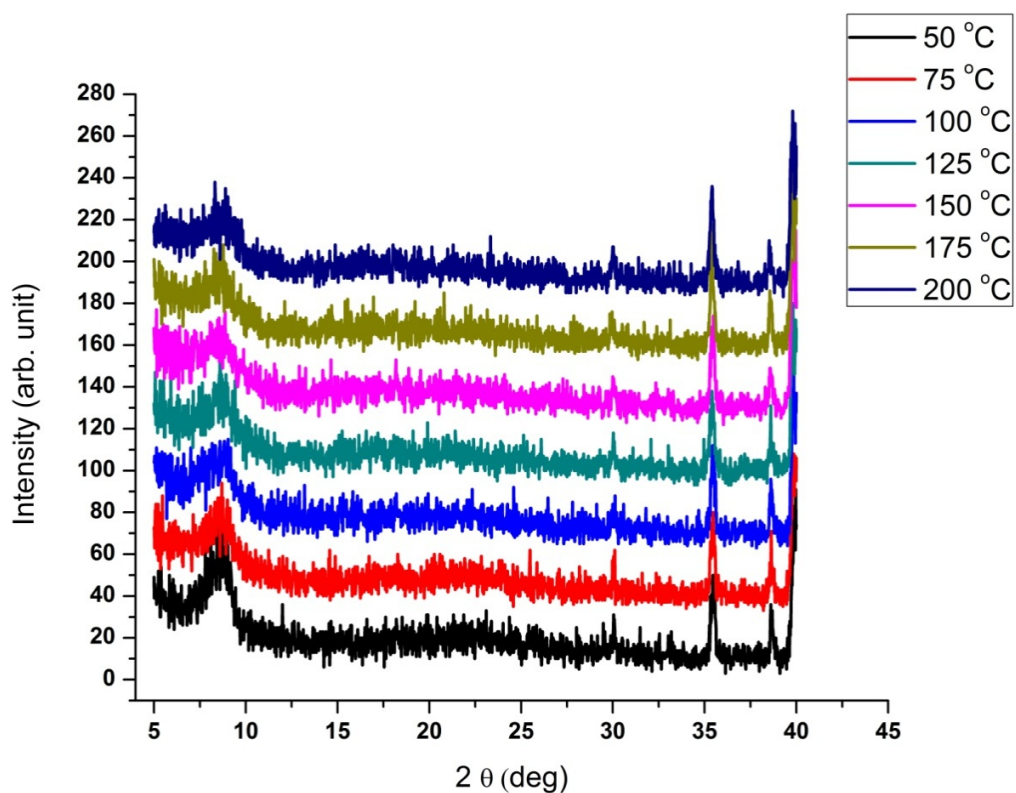

**Figure S4** X-ray powder diffraction patterns at various temperatures for Co-MOF1.

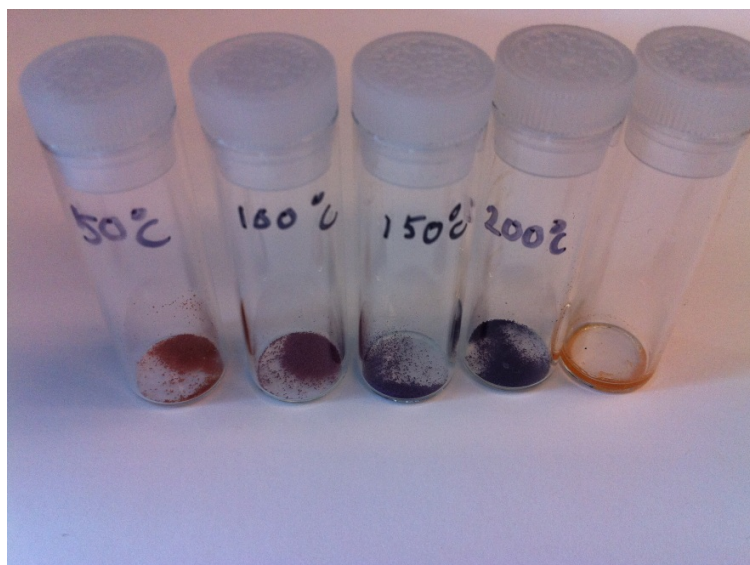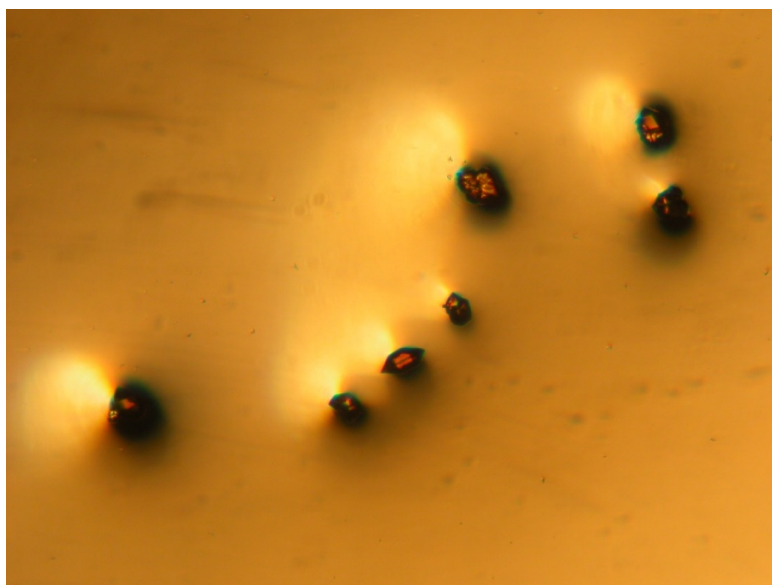

**Figure S5** (Top) Picture of the colour change of **Co-MOF1** crystals upon heating from 50 °C to 200 °C. The right vial represents the colour of the powder, which is the hydrated version of the powder heated at 200 °C. (Bottom) Crystals of **Co-MOF1** at room temperature.

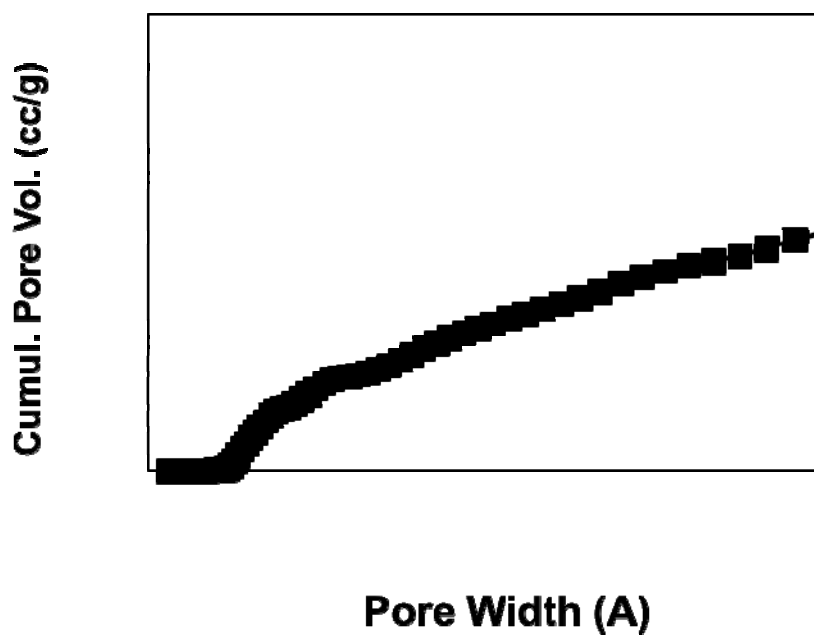

**Figure S6** Pore volume measurement for Co-MOF1.

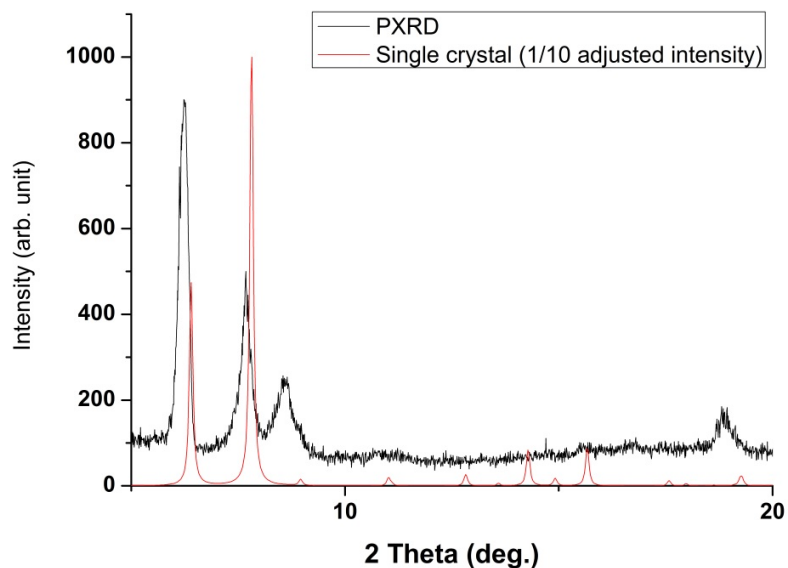

**Figure S7** X-ray powder diffraction pattern of Co-MOF1 (in black color). The red line is the simulated pattern generated from single crystal data of the sample.

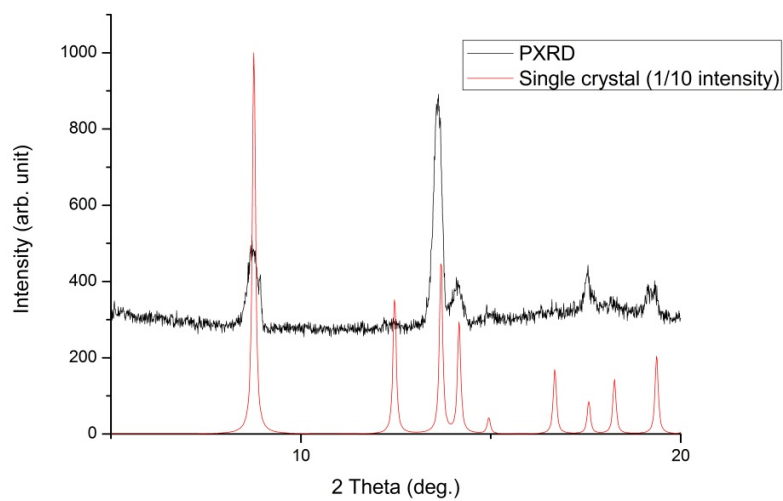

**Figure S8** X-ray powder pattern of **Co-MOF2** (in black color). The red line is the simulated pattern generated from single crystal data of the sample.

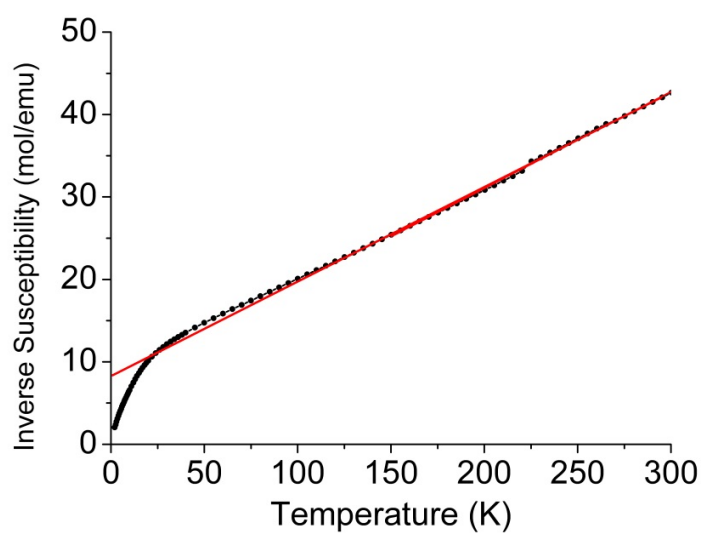

**Figure S9** The temperature dependence of the inverse susceptibility of **Co-MOF1** and its Curie-Weiss fitting (solid red line).

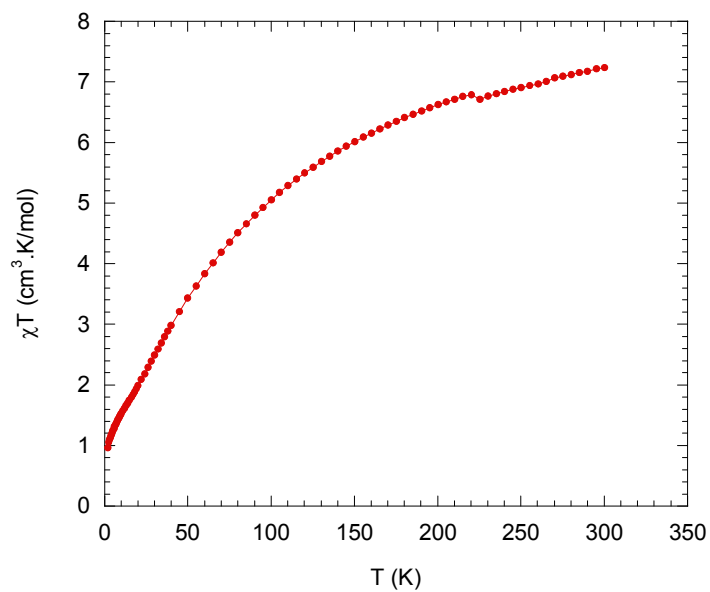

**Figure S10** Temperature dependence of  $\chi T$  product of **Co-MOF1**.

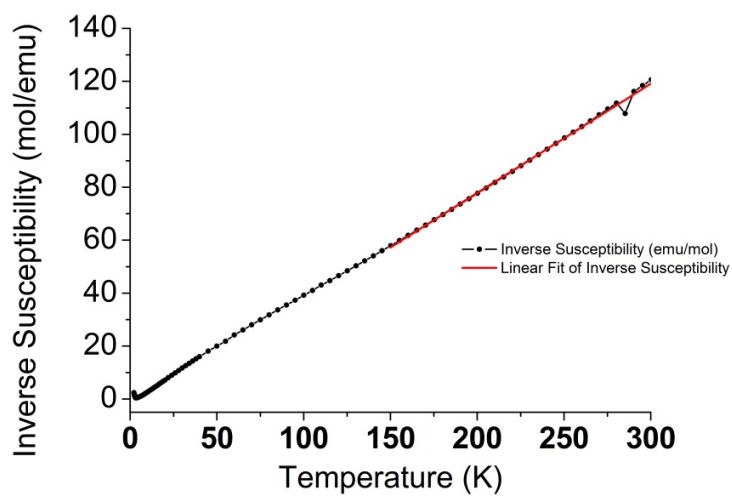

**Figure S11** The inverse susceptibility of **Co-MOF2** and its Curie-Weiss fitting.

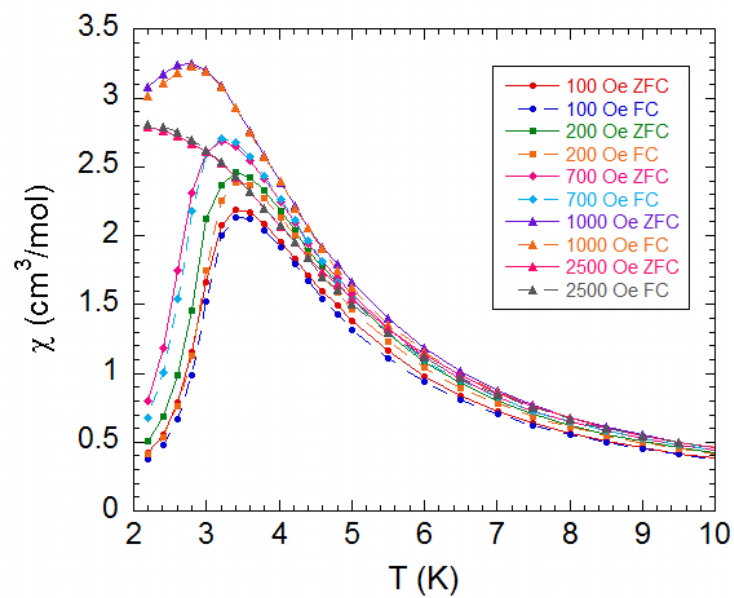

**Figure S12** The temperature dependence of magnetic susceptibility for **Co-MOF2**.
